# Supplementary material for: 0D chiral hybrid indium(iii) halides for second harmonic generation
Source: Royal Society of Chemistry journal article supplement (doi:10.1039/d2dt00925k), 2022-01-01
Supplement: d2dt00925k1.pdf [file d2dt00925k1.pdf]

## Supplementary Information

### 0D Chiral Hybrid Indium(III) Halides for Second Harmonic Generation

Siming Qi,<sup>a</sup> Fei Ge,<sup>a</sup> Xiao Han,<sup>a</sup> Puxin Cheng,<sup>a</sup> Rongchao Shi,<sup>a</sup> Chao Liu,<sup>a</sup> Yongshen Zheng,<sup>a</sup> Mingyang Xin,<sup>a</sup> Jialiang Xu<sup>\*a</sup>

School of Materials Science and Engineering, National Institute for Advanced Materials, Nankai University, Tongyan Road 38, Tianjin 300350, P. R. China

E-mail: [jialiang.xu@nankai.edu.cn](mailto:jialiang.xu@nankai.edu.cn)

**Table S1.** Crystal Data and Structure Refinement for (*R*-/*S*-MPEA)<sub>6</sub>InCl<sub>9</sub>.

| Compound                               | ( <i>R</i> -MPEA) <sub>6</sub> InCl <sub>9</sub>                  | ( <i>S</i> -MPEA) <sub>6</sub> InCl <sub>9</sub>                  |
|----------------------------------------|-------------------------------------------------------------------|-------------------------------------------------------------------|
| Empirical formula                      | C <sub>54</sub> H <sub>84</sub> N <sub>6</sub> Cl <sub>9</sub> In | C <sub>54</sub> H <sub>84</sub> N <sub>6</sub> Cl <sub>9</sub> In |
| Crystal system                         | Trigonal                                                          | Trigonal                                                          |
| Space group                            | <i>P</i> 3 <sub>2</sub> 21                                        | <i>P</i> 3 <sub>1</sub> 21                                        |
| Formula weight                         | 1251.14                                                           | 1251.14                                                           |
| Temperature (K)                        | 120                                                               | 100                                                               |
| Wavelength (Å)                         | 1.54184                                                           | 0.71073                                                           |
| D <sub>calc</sub> (mg/m <sup>3</sup> ) | 1.253                                                             | 1.269                                                             |
| Z                                      | 6                                                                 | 6                                                                 |
| Z'                                     | 1                                                                 | 1                                                                 |
| <i>a</i> (Å)                           | 17.05090(10)                                                      | 17.0073(2)                                                        |
| <i>b</i> (Å)                           | 17.05090(10)                                                      | 17.0073(2)                                                        |
| <i>c</i> (Å)                           | 39.5214(4)                                                        | 39.2070(6)                                                        |
| $\alpha$ (°)                           | 90                                                                | 90                                                                |
| $\beta$ (°)                            | 90                                                                | 90                                                                |
| $\gamma$ (°)                           | 120                                                               | 120                                                               |
| V (Å <sup>3</sup> )                    | 9950.79(15)                                                       | 9821.2(3)                                                         |
| GOF                                    | 1.034                                                             | 1.037                                                             |

|                    |           |         |
|--------------------|-----------|---------|
| F(000)             | 3912      | 3912    |
| $R1[>2\sigma(I)]$  | 0.0419    | 0.0415  |
| $wR2[>2\sigma(I)]$ | 0.1211    | 0.1188  |
| Flack parameter    | -0.011(2) | 0.0415  |
| CCDC number        | 2161725   | 2161726 |

**Table S2.** Selected bond angles for  $(R\text{-MPEA})_6\text{InCl}_9$ .

| Atom | Atom | Atom | Angle/ ° |
|------|------|------|----------|
| Cl1  | In1  | Cl2  | 90.69    |
| Cl1  | In1  | Cl3  | 89.82    |
| Cl1  | In1  | Cl5  | 88.86    |
| Cl1  | In1  | Cl6  | 90.10    |
| Cl4  | In1  | Cl2  | 89.43    |
| Cl4  | In1  | Cl3  | 89.98    |
| Cl4  | In1  | Cl5  | 91.01    |
| Cl4  | In1  | Cl6  | 90.11    |
| Cl2  | In1  | Cl3  | 88.86    |
| Cl2  | In1  | Cl6  | 90.09    |
| Cl5  | In1  | Cl3  | 89.22    |
| Cl5  | In1  | Cl6  | 91.84    |

**Table S3.** Selected bond lengths for  $(R\text{-MPEA})_6\text{InCl}_9$ .

| Atom | Atom | Length/ Å |
|------|------|-----------|
| In1  | Cl1  | 2.519     |
| In1  | Cl2  | 2.509     |
| In1  | Cl3  | 2.538     |
| In1  | Cl4  | 2.512     |
| In1  | Cl5  | 2.498     |

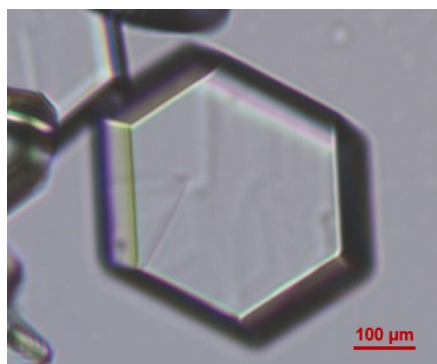

**Figure S1.** The optical microscope image of  $(R-/S\text{-MPEA})_6\text{InCl}_9$  crystal in polarized optical micrograph.

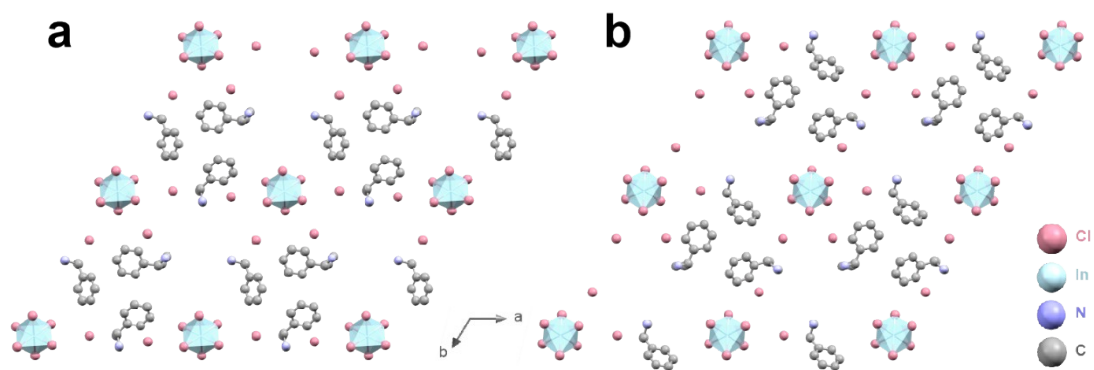

**Figure S2.** Crystallographic structure diagram of the OD chiral hybrid Indium halides. View of the structure of (a)  $(R\text{-MPEA})_6\text{InCl}_9$  and (b)  $(S\text{-MPEA})_6\text{InCl}_9$  along the crystallographic  $c$ -axis.

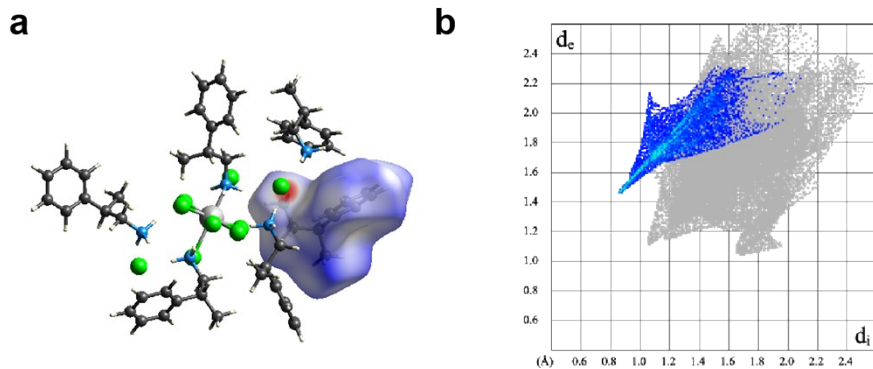

Figure S3. (a) Hirshfeld  $d_{norm}$  surfaces in  $(R\text{-MPEA})_6\text{InCl}_9$ . (b) 2D fingerprint plots in  $(R\text{-MPEA})_6\text{InCl}_9$ .

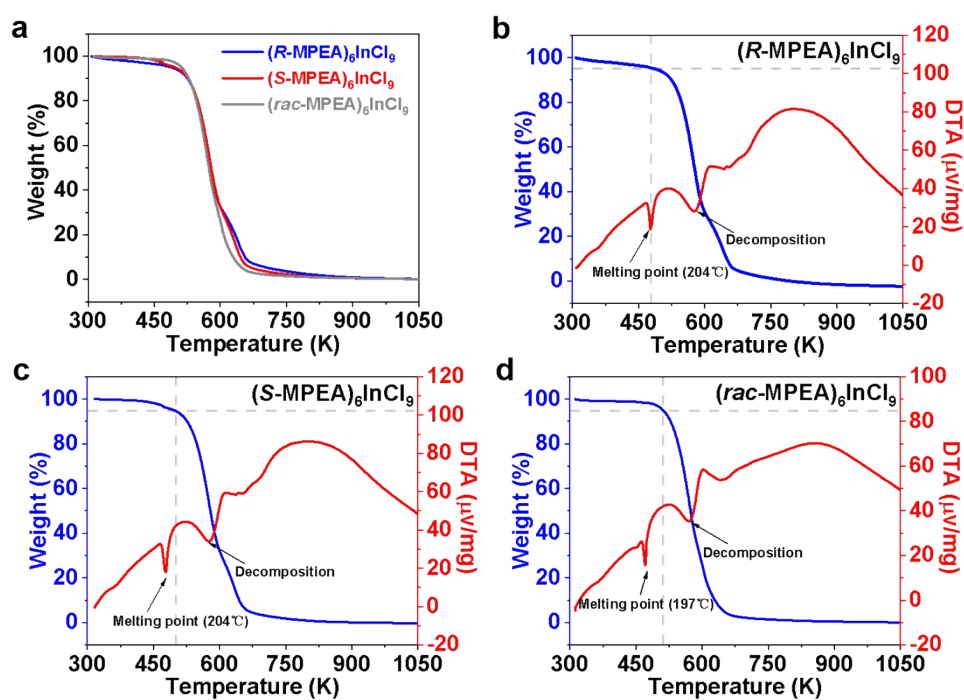

Figure S4. TG-DTA spectra of chiral  $(R\text{-}/S\text{-}/rac\text{-MPEA})_6\text{InCl}_9$  crystals.

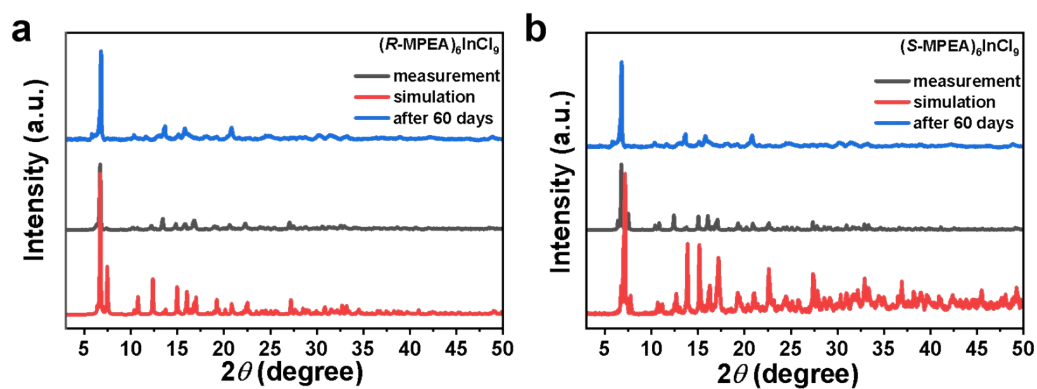

Figure S5. PXRD patterns of chiral (a)  $(R\text{-MPEA})_6\text{InCl}_9$  and (b)  $(S\text{-MPEA})_6\text{InCl}_9$  crystals.

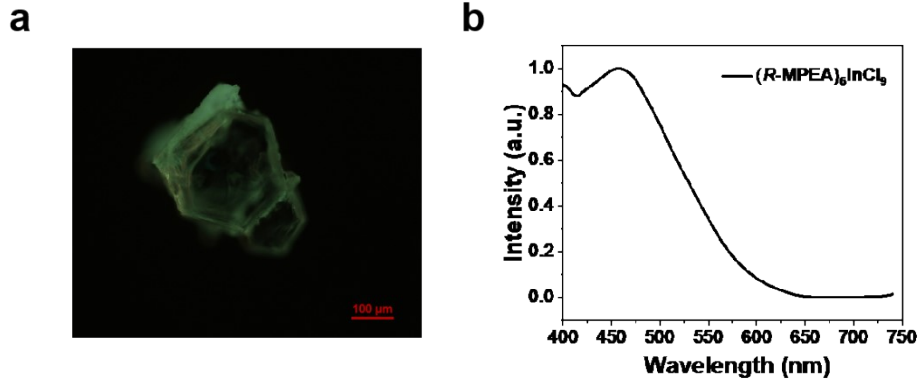

**Figure S6.** (a) The FL microscope image of chiral  $(R-/S\text{-MPEA})_6\text{InCl}_9$  crystal taken by the fluorescence microscope. (b) The fluorescence spectrum of chiral  $(R-/S\text{-MPEA})_6\text{InCl}_9$  crystal.

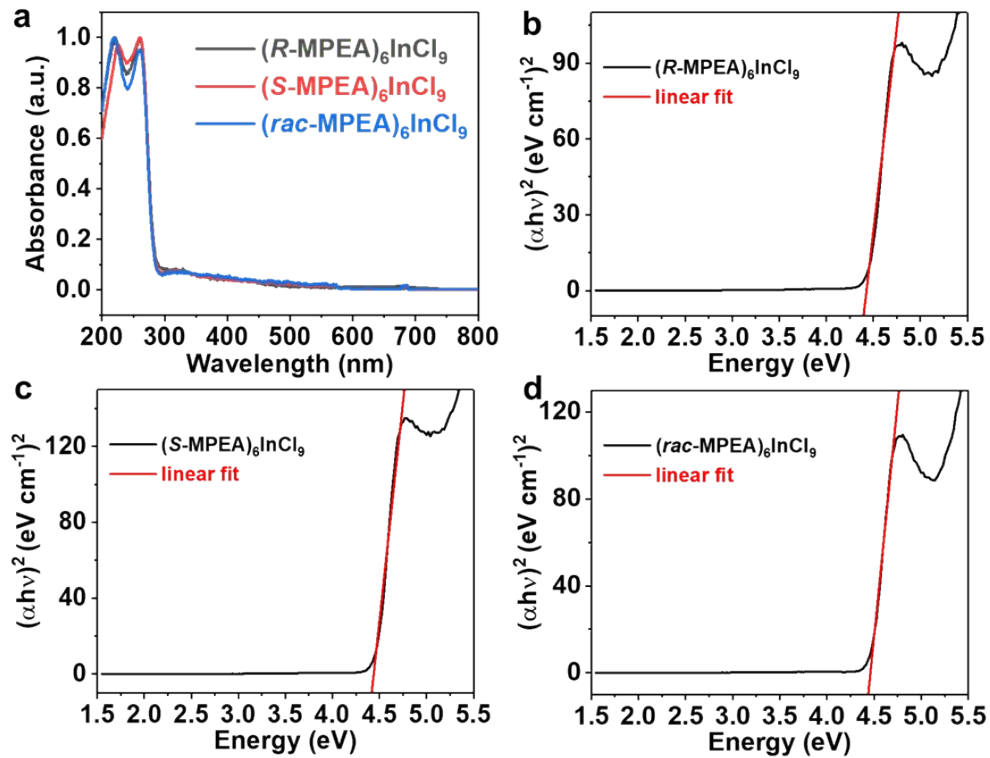

**Figure S7.** The DRS and Tauc plot of chiral  $(R-/S-/rac\text{-MPEA})_6\text{InCl}_9$  crystal.

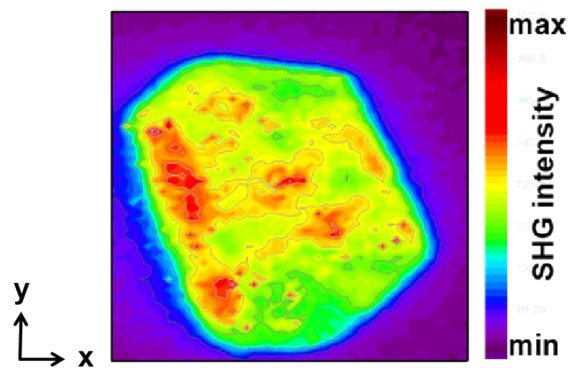

**Figure S8.** The mapping image of the SHG intensity from a  $(R\text{-MPEA})_6\text{InCl}_9$  single crystal (scanning area:  $x \times y = 3.2 \times 2.5 \text{ mm}^2$ ).

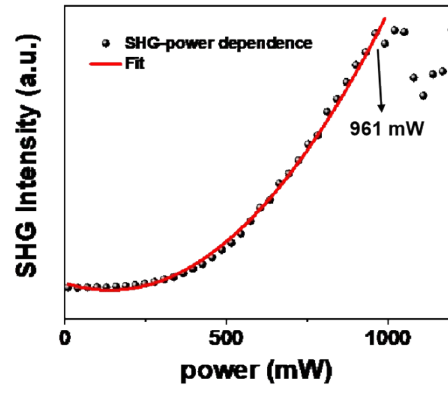

**Figure S9.** Power dependence of SHG from  $(R\text{-MPEA})_6\text{InCl}_9$  single crystal, in which LDT is  $\sim 3.82 \text{ mJ cm}^{-2}$  (pumped at 800 nm, pulse width: 100 fs, the laser spot of 20  $\mu\text{m}$  in diameter).
